# Supplementary material for: Rapid tryptic peptide mapping of human serum albumin using DI-MS/MSALL
Source: Royal Society of Chemistry journal article supplement (doi:10.1039/d1ra08717g), 2022-01-01
Supplement: d1ra08717g2.pdf [file d1ra08717g2.pdf]

## Supplemental information

### Rapid tryptic peptide mapping of human serum albumin using DI- MS/MS<sup>ALL</sup>

Ke Zhang,<sup>#</sup> Xingcheng Gong,<sup>#</sup> Qian Wang, Pengfei Tu, Jun Li, Yuelin Song\*

Modern Research Center for Traditional Chinese Medicine, School of Chinese Materia Medica,  
Beijing University of Chinese Medicine, Beijing 100029, China

\* Correspondence to: Yuelin Song, E-mail: syltwc2005@163.com

<sup>#</sup> These two authors contributed equally to this article.

#### Figure legends

**Fig. S1** The canonical sequence of HSA (ID: P02768) obtained from UniProt, and the peptides captured by DI-MS/MS<sup>ALL</sup> and LC-MS/MS, including 4 ones (blue characters) solely found by LC-MS/MS, 47 ones (red characters) found by either DI-MS/MS<sup>ALL</sup> or LC-MS/MS, and four ones (black characters) found by neither DI-MS/MS<sup>ALL</sup> nor LC-MS/MS.

**Fig. S2** Overlaid extract ion current chromatogram of tryptic peptide pool of HSA acquired by LC-MS/MS.

**Fig. S3** Representative MS<sup>2</sup> spectral comparison of LC\*TVATLR between DI-MS/MS<sup>ALL</sup> (upper) and LC-MS/MS (downer) and the assignment of primary fragment ions to the fragments.

DAHKSEVAHRFKDLGEENFKALVLI AFAQYLQQCPFEDHVKLVNEVTEFAKTCVADESA  
ENC DKSLHTLFGDKLCTVATLRETYGEMADCCA KQEPERNECFLQHKDDNP NLPRLVRP  
EVDVMCTAFHDNEETFLKKYLYE IARRHPYFYAPELLFFAKRYKAAFTECCQAADKAAC  
LLPKLDEL RDEGKASSAKQRLK CASLQKFGERAFKAWAVARLSQRFPKAEFAEVSKLVT  
DLTKVHTECCHGDLLECADDRADLAKYICENQDSISSKLKECCEKPLLEKSHCIAEVEND  
EMPADLPSLAADFVESKDVCKNYAEAKDVFLGMFLYEARRHPDYSV VLLLRLAKTYET  
TLEKCCAAADPHECYAKVFDEFKPLVEEPQNLIKQNC ELFQ LGEYKFQNALLVRYTKK  
VPQVSTPTLVEVSRNLGKVGSKCCKHPEAKRMPCAEDYLSVVLNQLCVLHEKTPVSDRV  
TKCCTESLVNRRPCFSALEVDETYVPKEFNAETFTFHADICTLSEKERQIKKQTALVELVK  
HKPKATKEQLKAVMDDFAAFVEKCCKADDKETCFAEEGKKLVAASQAALGL

**Fig. S1**

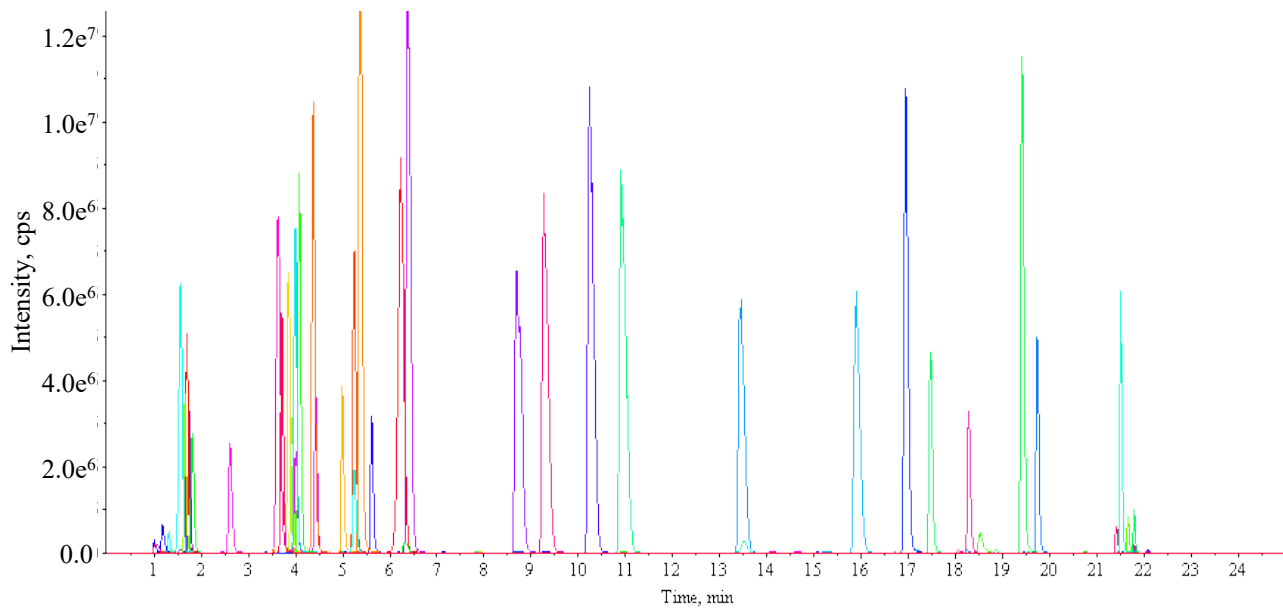

**Fig. S2**

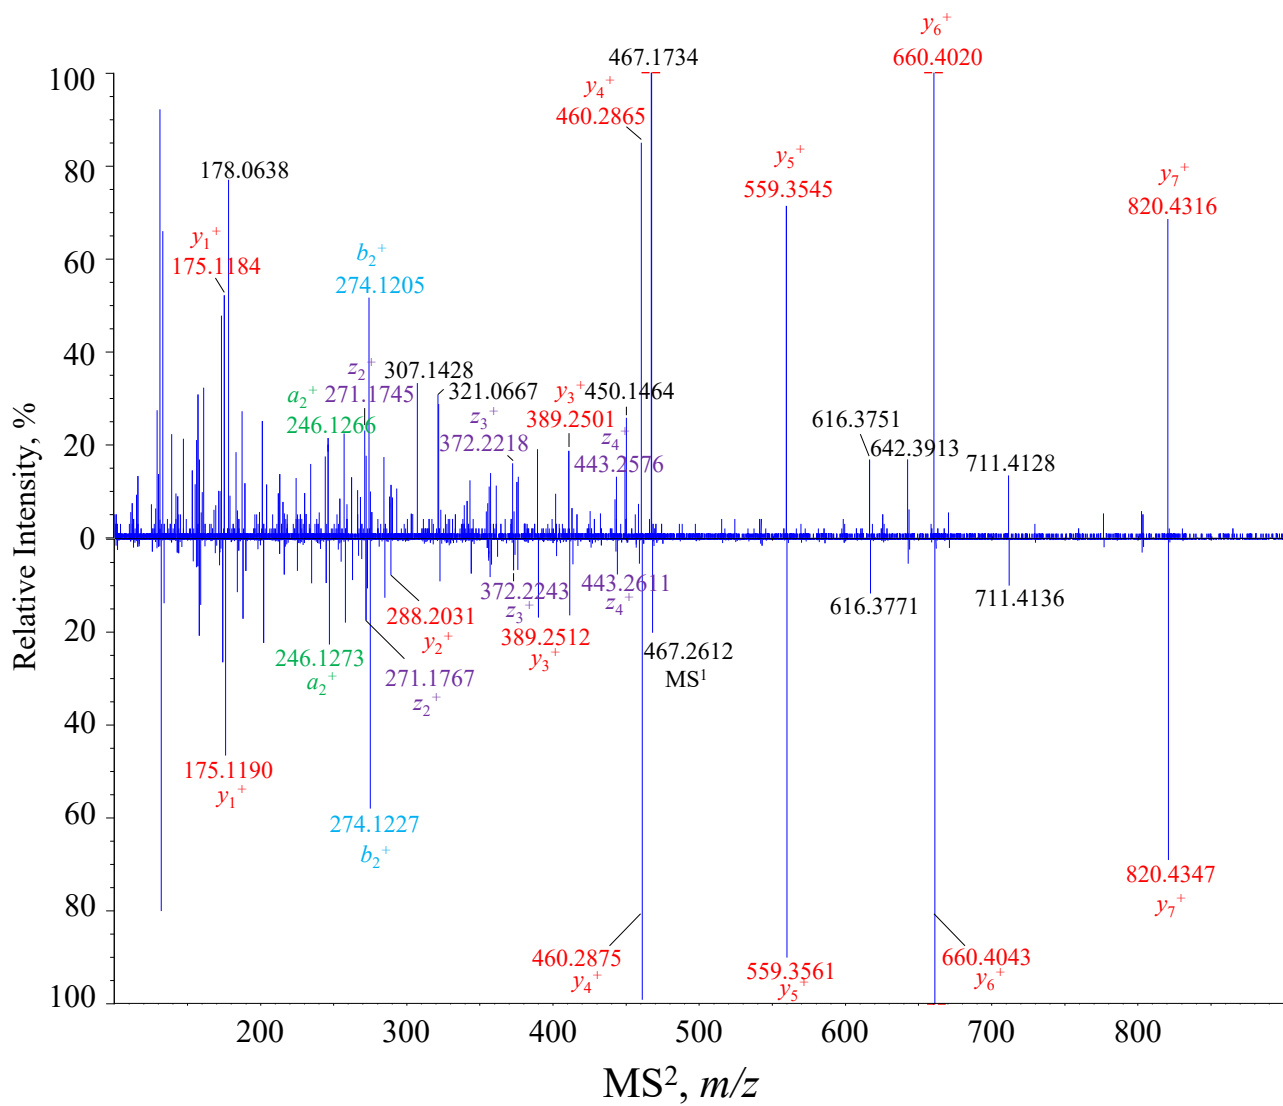

Fig. S3
